# Supplementary material for: Identification of Broad-Spectrum MMP Inhibitors by Virtual Screening
Source: MDPI journal article supplement (doi:10.3390/molecules26154553), 2021-07-28

## Supplementary materials for

### ***Identification of broad-spectrum MMP inhibitors by virtual screening***

Aleix Gimeno,<sup>1</sup> Doretta Cuffaro,<sup>2</sup> Elisa Nuti,<sup>2</sup> María José Ojeda-Montes,<sup>1</sup> Raúl Beltrán-Debón,<sup>1</sup> Miquel Mulero,<sup>1</sup> Armando Rossello,<sup>2</sup> Gerard Pujadas,<sup>1\*</sup> Santiago Garcia-Vallvé<sup>1\*</sup>

<sup>1</sup> Research group in Cheminformatics & Nutrition, Departament de Bioquímica i Biotecnologia, Universitat Rovira i Virgili, Campus de Sescelades, 43007 Tarragona, Catalonia, Spain

<sup>2</sup> Department of Pharmacy, University of Pisa, Via Bonanno 6, 56126 Pisa, Italy

\* Correspondence to gerard.pujadas@gmail.com (GP); santi.garcia-vallve@urv.cat (SGV)

**Table S1.** Canonical SMILES and PAINS-REMOVER (<https://www.cbligand.org/PAINS/>) results for the 20 compounds selected for *in vitro* validation.

| Molecule ID | Canonical SMILES                                                 | Classified as a PAINS by PAINS-REMOVER |
|-------------|------------------------------------------------------------------|----------------------------------------|
| 1           | <chem>CC(OC(=O)c1c(C)oc2c1cc(cc2)NS(=O)(=O)c1ccc(cc1)Br)C</chem> | No                                     |
| 2           | <chem>CN(/N=N/c1ccc(cc1)S(=O)(=O)/N=C(/CCC(=O)[O-])[O-])C</chem> | Yes                                    |
| 3           | <chem>BrC1ccc(cc1)/C=C/C(=O)c1cc(Br)ccc(=O)c1O</chem>            | No                                     |
| 4           | <chem>O=C(Nc1ccc(cc1)S(=O)(=O)NCCc1cccc1)CCC(=O)O</chem>         | No                                     |
| 5           | <chem>lc1ccc(cc1)S(=O)(=O)Nc1cccc1C(=O)O</chem>                  | No                                     |
| 6           | <chem>O=C(Nc1sc(c1C(=O)O)c1ccc(cc1)Br)/C=C/c1ccco1</chem>        | No                                     |
| 7           | <chem>O=C(c1cccc(=O)c1O)/C=C/c1cccc(c1)Oc1cccc1</chem>           | No                                     |
| 8           | <chem>Cc1cc(O)c(c(=O)o1)/C(=N/NS(=O)(=O)c1cccc1)/C</chem>        | No                                     |
| 9           | <chem>OC(=O)CCCCNS(=O)(=O)c1ccc2c(c1)oc(=O)n2C</chem>            | No                                     |
| 10          | <chem>O=C(Nc1ccc(cc1)S(=O)(=O)Nc1noc(c1)C)COc1ccc(cc1)Br</chem>  | No                                     |
| 11          | <chem>O=C(NS(=O)(=O)c1ccc(cc1)C)OCc1cccc1F</chem>                | No                                     |
| 12          | <chem>COc1ccc(cc1)C(=O)Nc1ccc(cc1)S(=O)(=O)Nc1cccc1</chem>       | No                                     |
| 13          | <chem>Oc1ccc(cc1/C=N/c1ccc(cc1)c1cccc1)[N+](=O)O</chem>          | No                                     |
| 14          | <chem>CC(=O)Nc1ccc(cc1)S(=O)(=O)Nc1ccc(cc1)C(=O)OC(C)C</chem>    | No                                     |
| 15          | <chem>BrCCc1ccc(cc1)c1cs/c(=N)c2cccc(c2)C(=O)O/o1</chem>         | No                                     |
| 16          | <chem>O=C(Nc1cccc(c1)NC(=O)CCC(=O)O)CCc1cccc1</chem>             | No                                     |
| 17          | <chem>COc1ccc(cc1)c1nnc(n1c1ccc(cc1)S(=O)(=O)N)S</chem>          | No                                     |
| 18          | <chem>OC(=O)c1cccc1C(=O)Nc1ccc(cc1)S(=O)(=O)Nc1c(C)cccc1C</chem> | No                                     |
| 19          | <chem>OC(=O)CCc1ccc(n1NC(=S)N)c1ccc(cc1)Br</chem>                | No                                     |
| 20          | <chem>O=C(Nc1ccc(cc1)Oc1ccc(cc1)Br)CCCC(=O)O</chem>              | No                                     |

**Figure S1.** Best docking poses for hit compounds **7**, **8** and **15** at the Zn<sup>2+</sup> binding site of MMP-8, MMP-9, MMP-12 and MMP-13. Docked poses for **15**/MMP-8, **7**/MMP-12 and **8**/MMP-13 pairs are not shown because these compounds/target pairs were not predicted to be possible by the virtual screening workflows.

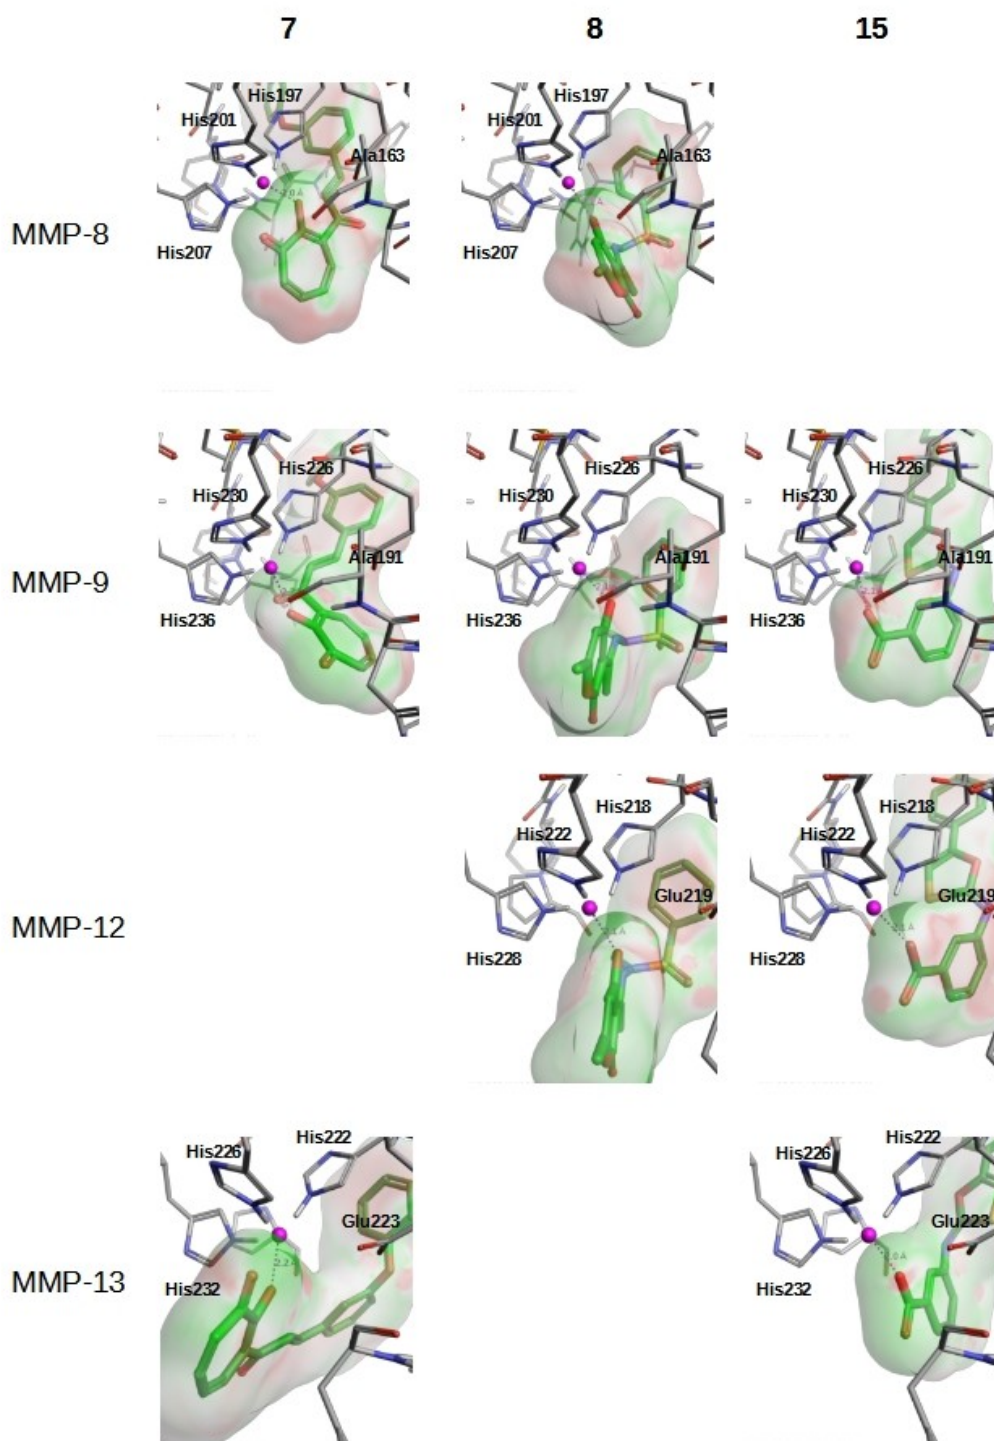

**Figure S2.** Best docking poses for natural compounds **5186914** and **8177094** at the Zn<sup>2+</sup> binding site of MMP-8, MMP-9, MMP-12 and MMP-13.

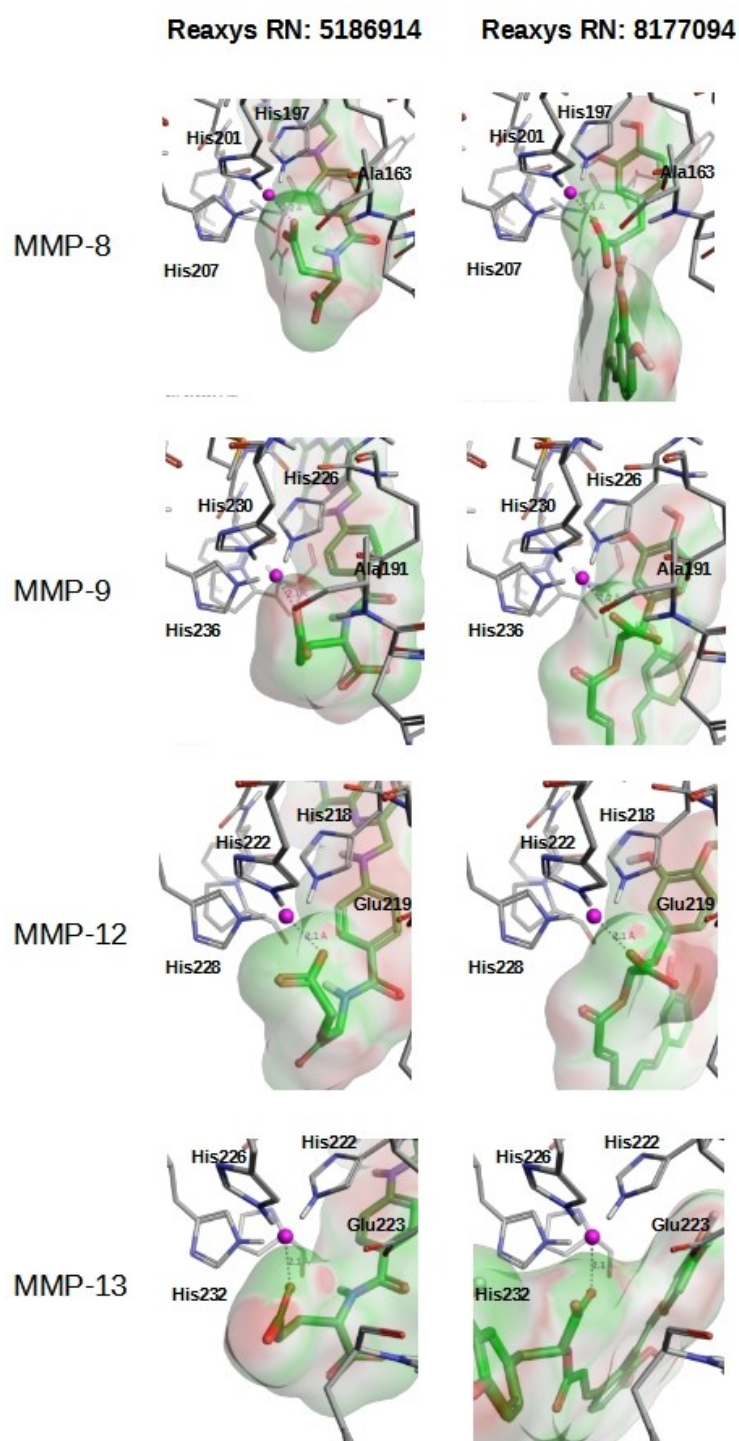

**Figure S3.** Histogram representations of the highest electrostatic Tanimoto (*i.e.* EON\_ET\_pb) values obtained when comparing the validation set to each query. Panels A, B, C and D show the validations for each of the queries for MMP-8, -9, -12 and -13, respectively. For each query, two histograms are shown: one corresponding to the actives and one corresponding to the decoys. In the actives histogram, actives with a pX lower than 4 are in red, actives with a pX between 4 and 7 are in blue, and actives with a pX higher than 7 are in green. In the decoys histogram, decoys are in cyan.

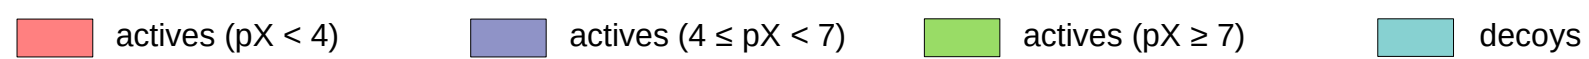

A

MMP-8

1BZS

1ZVX

3DNG

3DPE

Number of compounds

3DPF

3TT4

EON\_ET\_pb

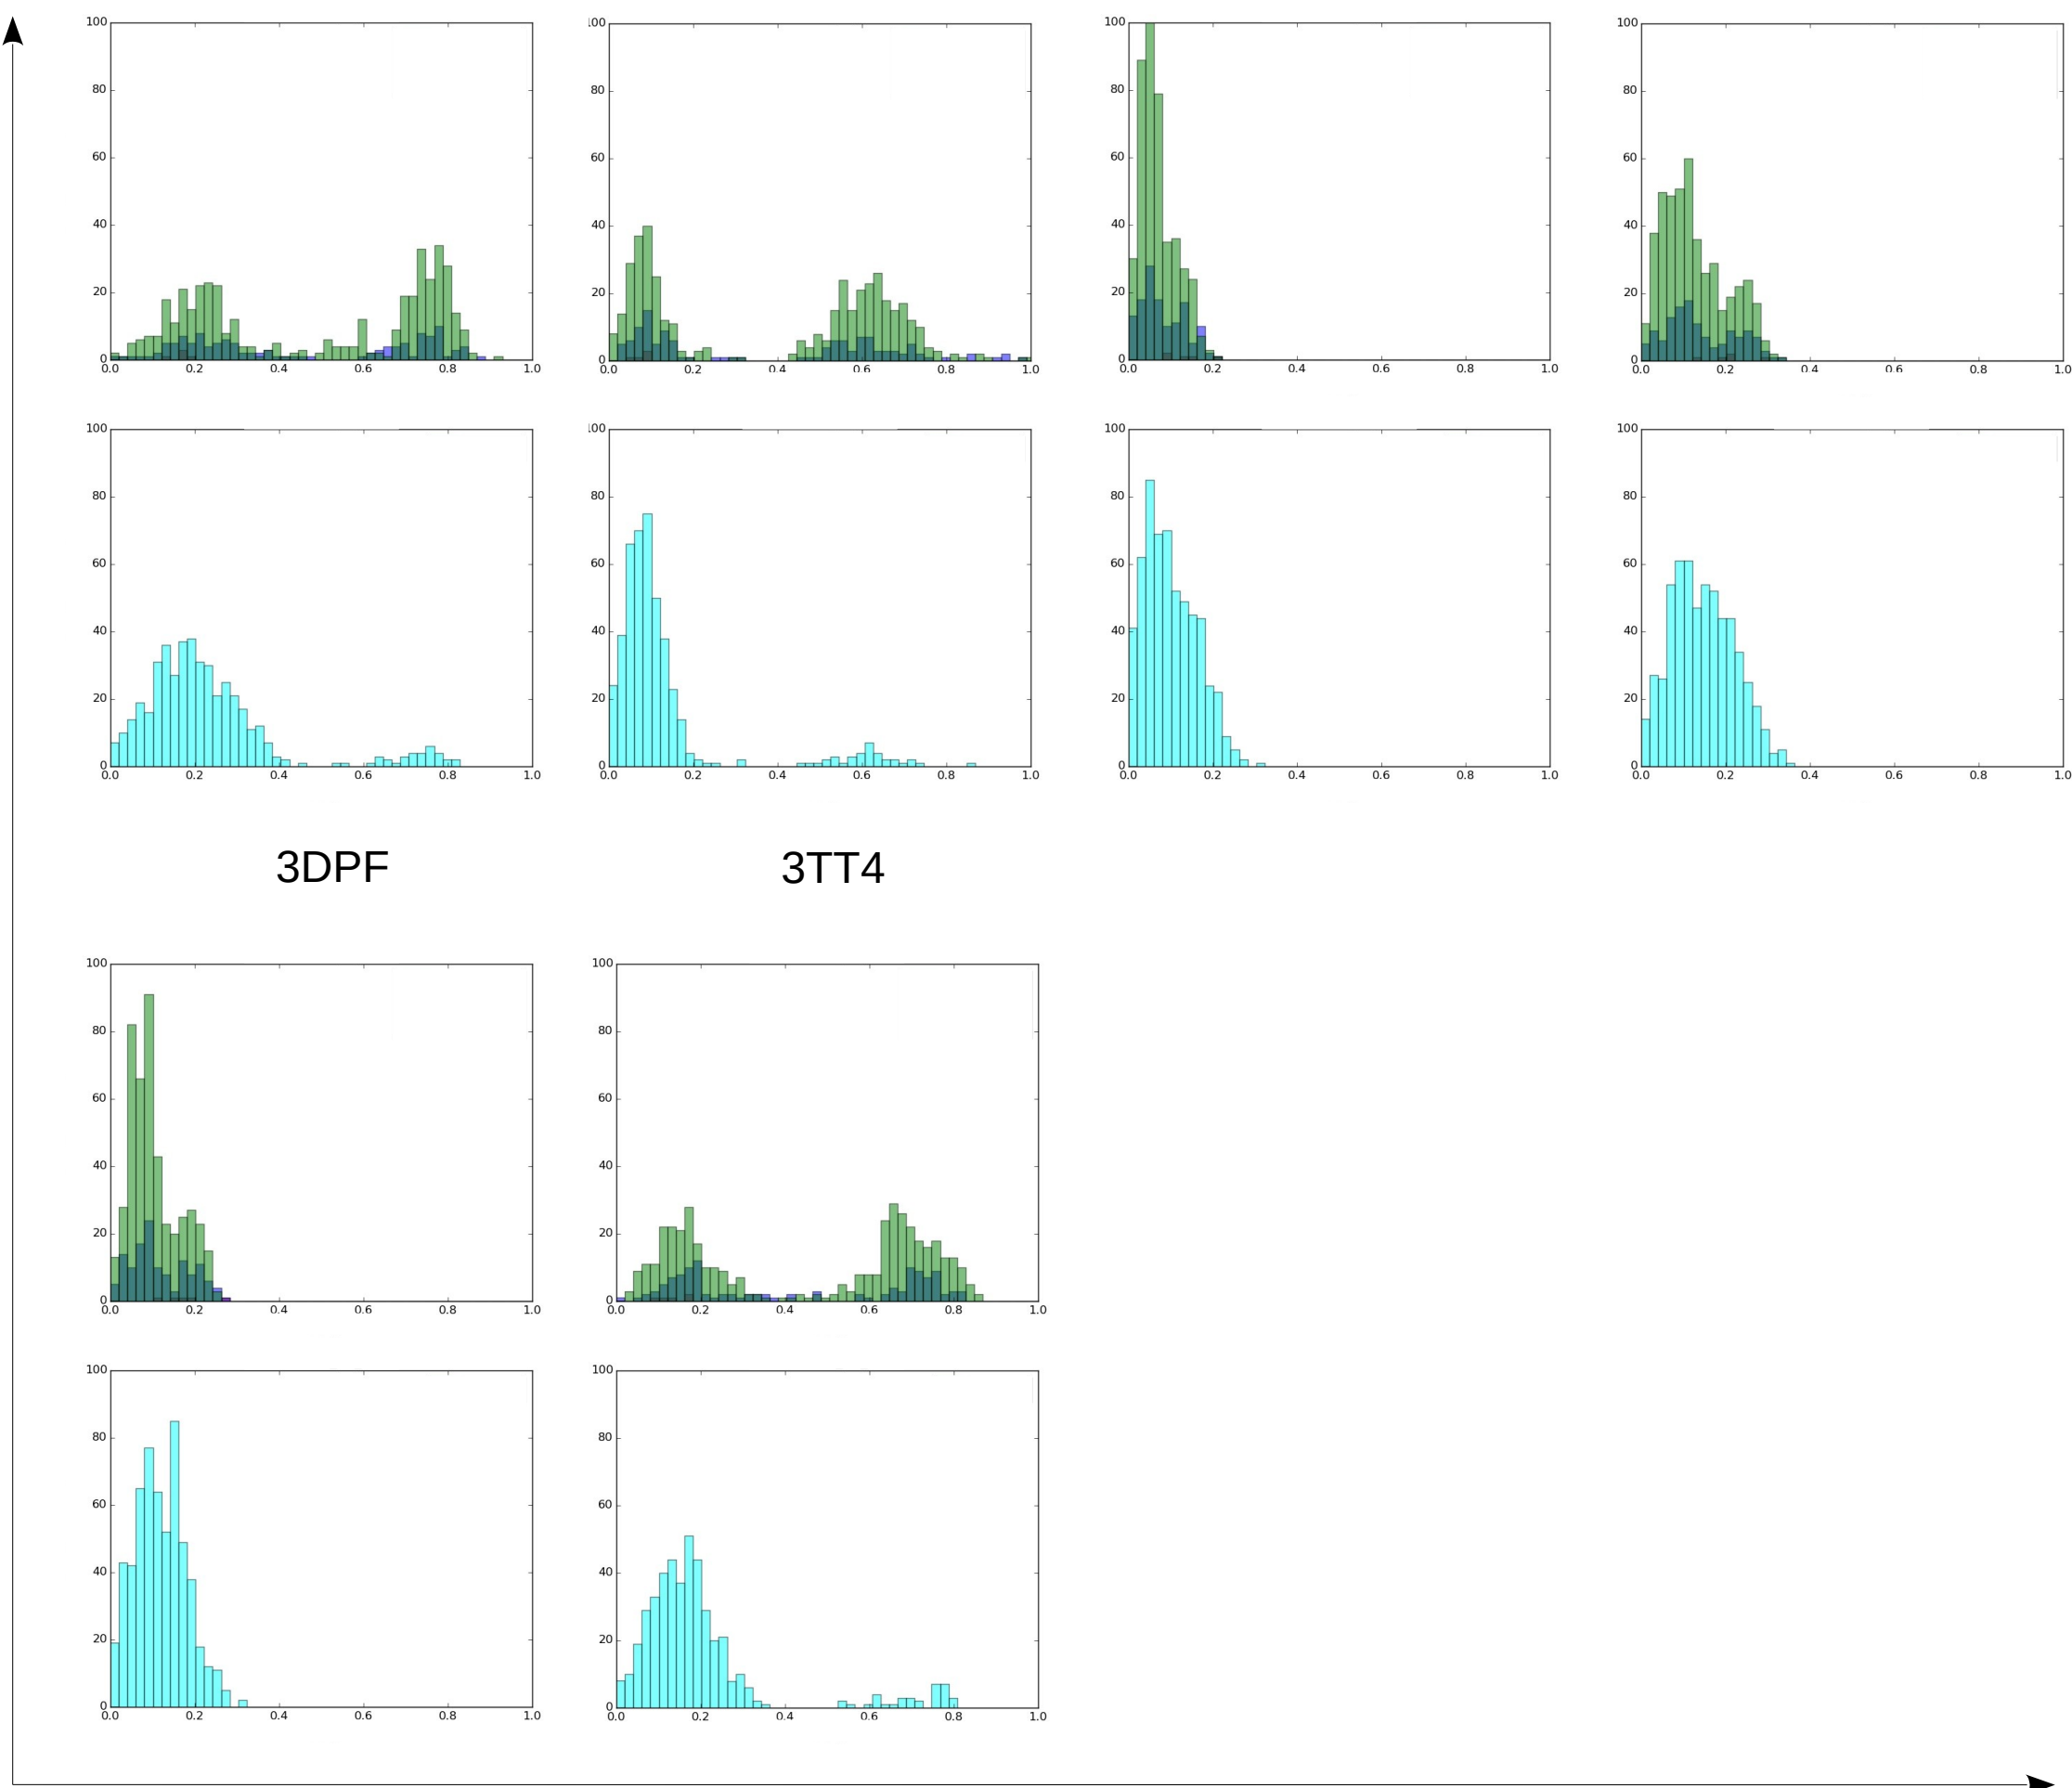

B

MMP-9

2OVX

2OVZ

2OW1

2OW2

Number of compounds

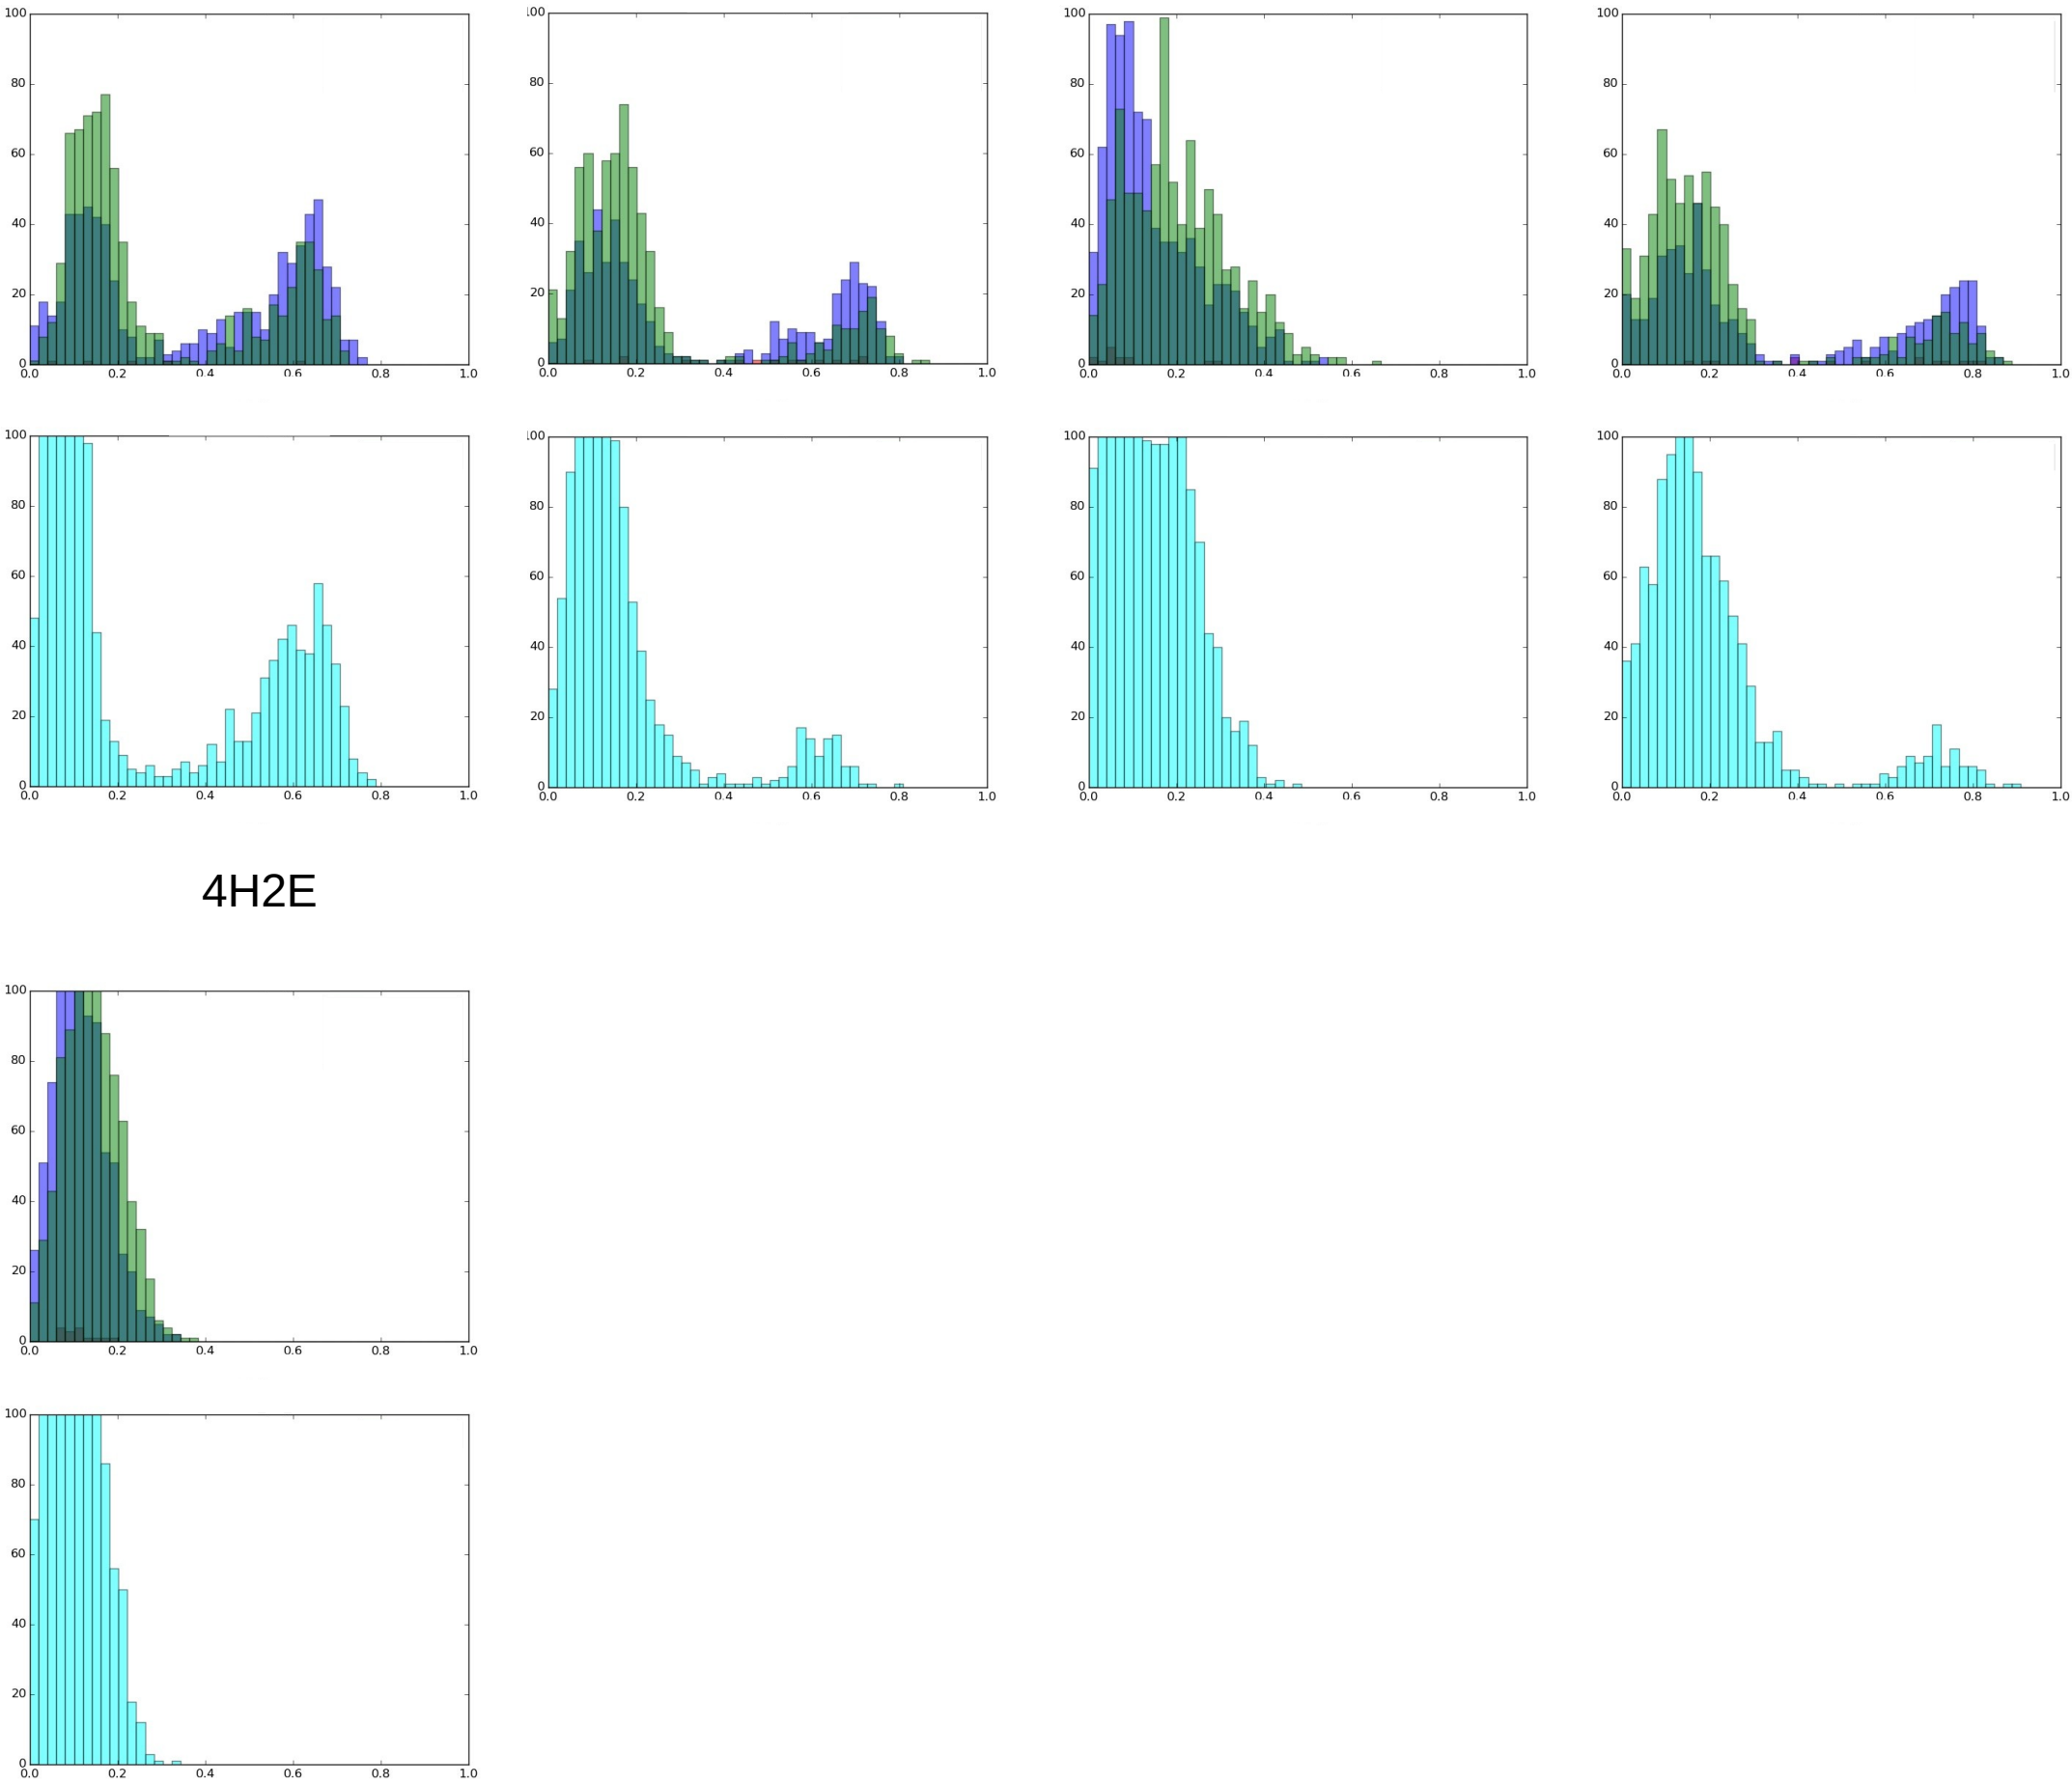

4H2E

EON\_ET\_pb

C

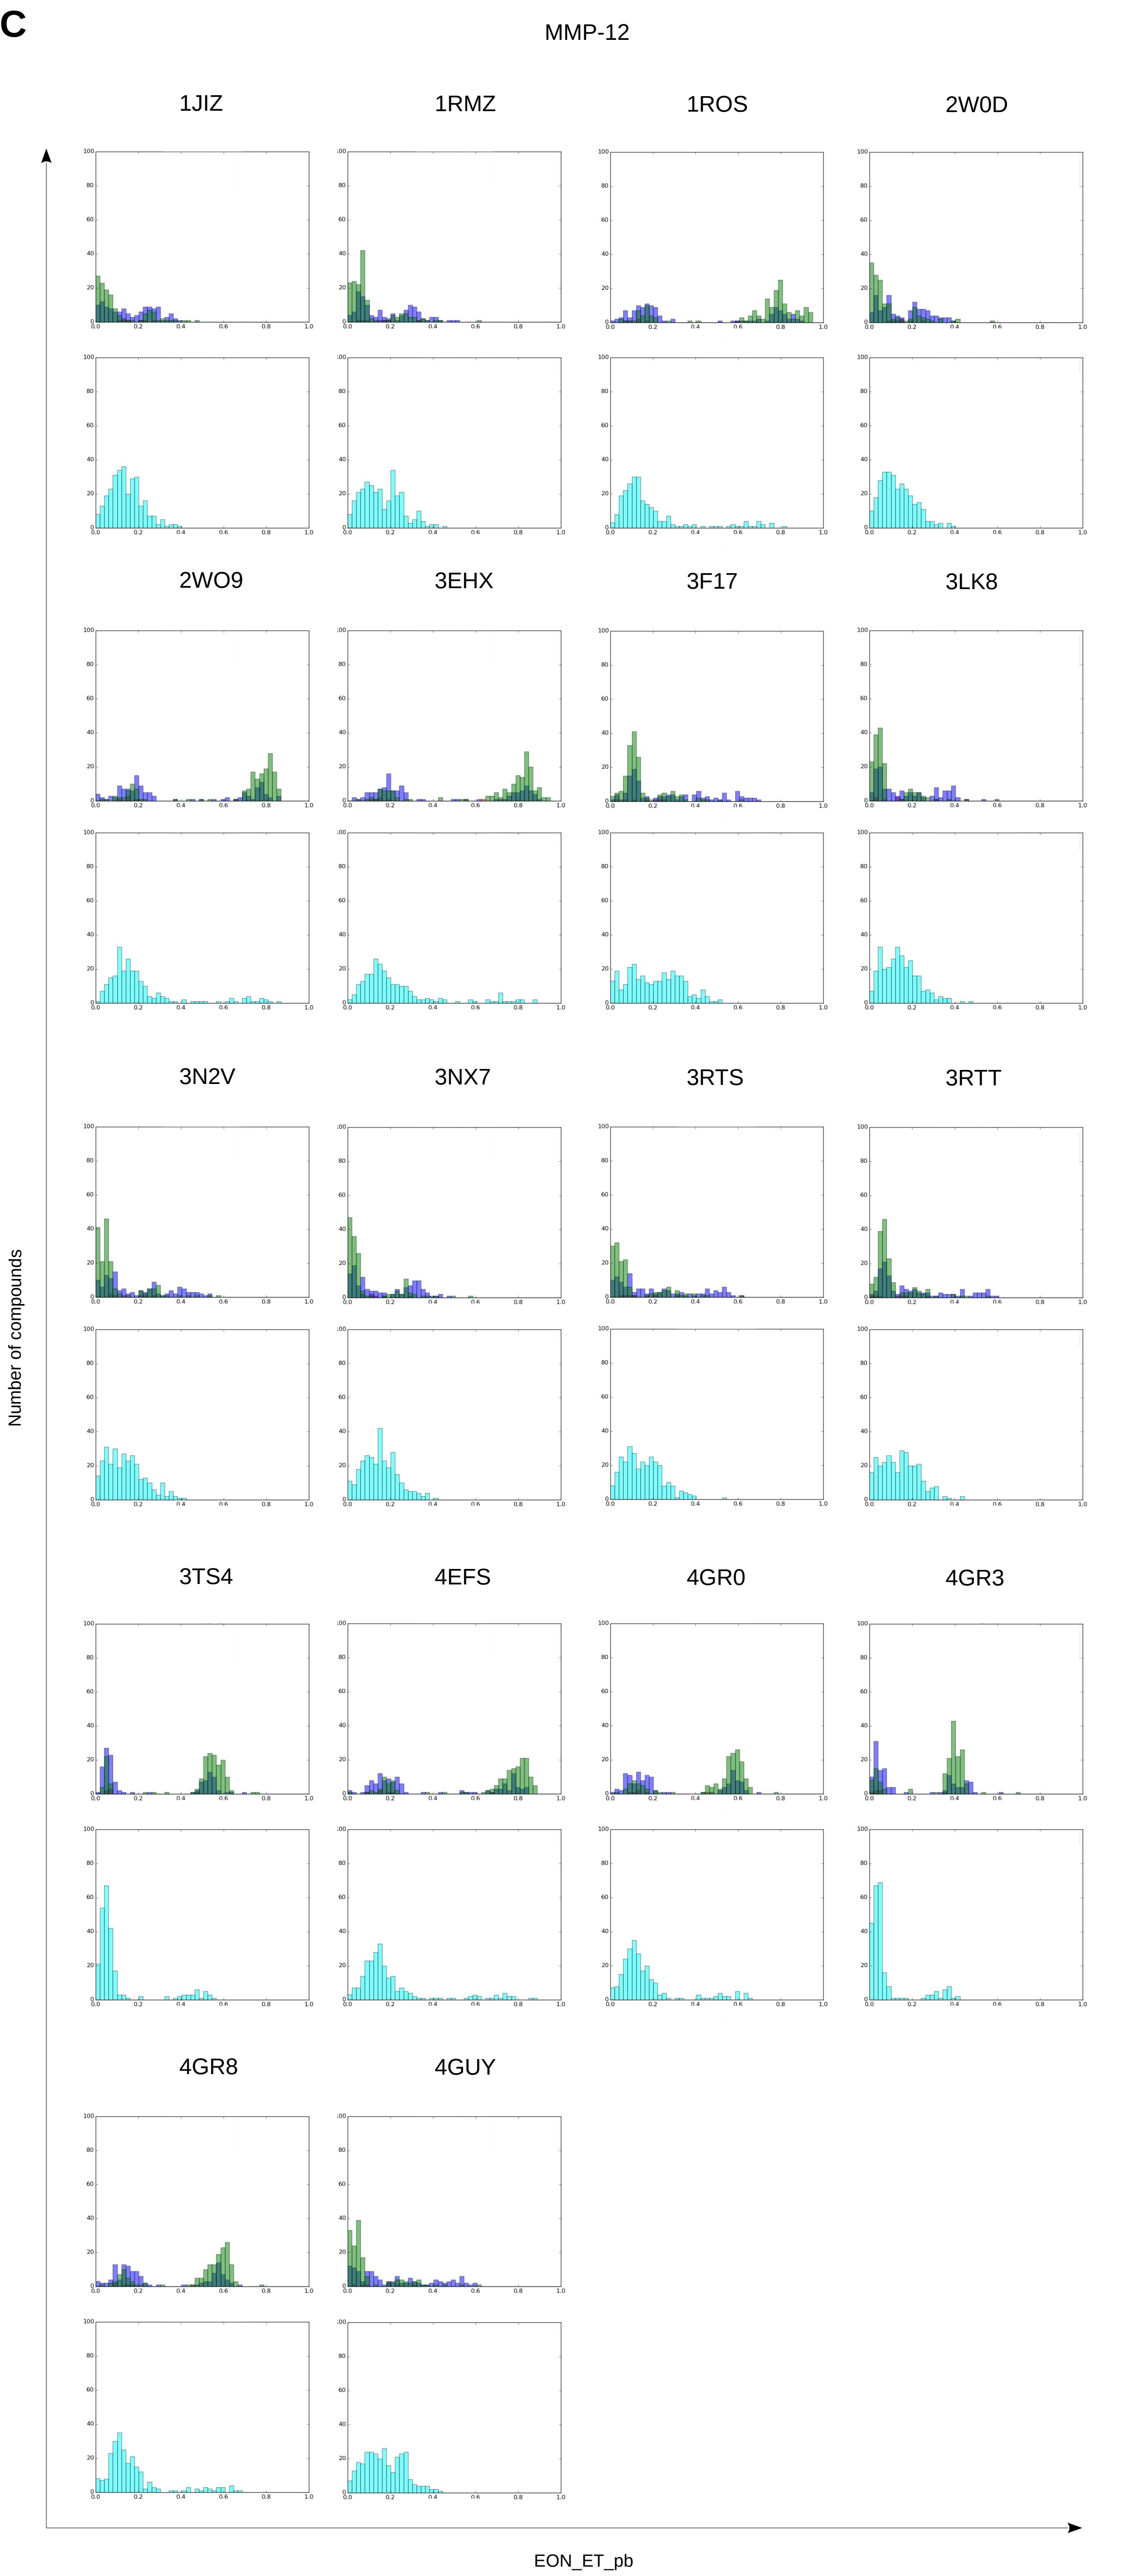



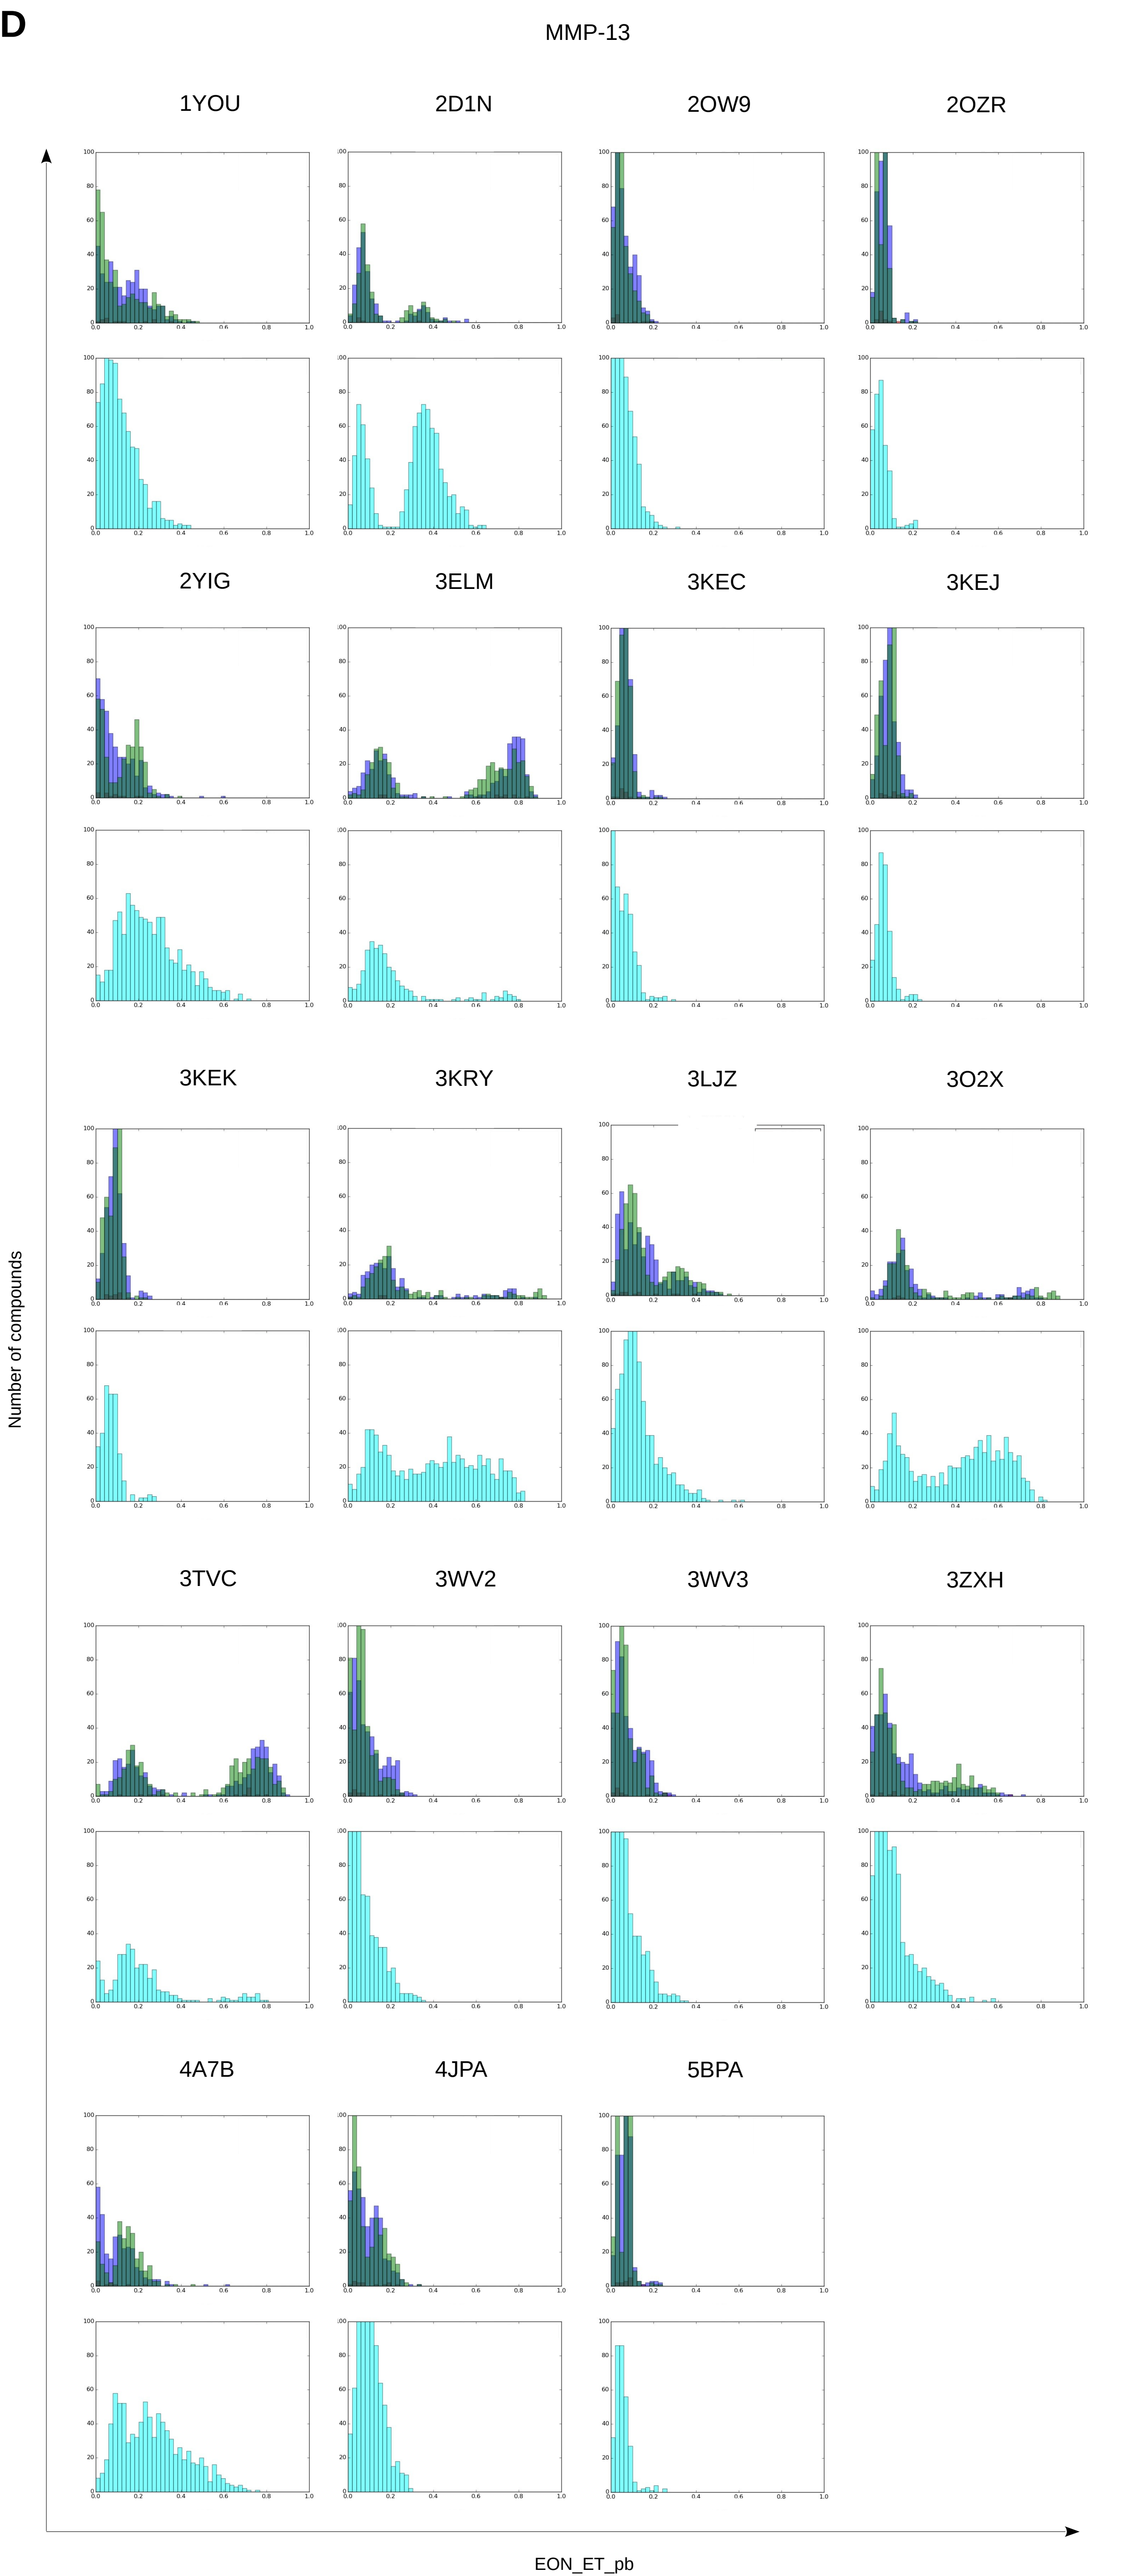

Supplement: s1 [file s1]
